# Supplementary material for: Long-lasting Symptoms After an Acute COVID-19 Infection and Factors Associated With Their Resolution
Source: PubMed Central journal article supplement (PMC9647489; doi:10.1001/jamanetworkopen.2022.40985), 2022-11-09
Supplement: jamanetwopen-e2240985-s001.pdf [file jamanetwopen-e2240985-s001.pdf]

## Supplementary Online Content

Robineau O, Zins M, Touvier M, et al; Santé, Pratiques, Relations et Inégalités Sociales en Population Générale Pendant la Crise COVID-19–Sérologie (SAPRIS-SERO) Study Group. Long-lasting symptoms after an acute COVID-19 infection and factors associated with their resolution. *JAMA Netw Open*. 2022;5(11):e2240985. doi:10.1001/jamanetworkopen.2022.40985

**eFigure 1.** Flowchart of the Study

**eTable 1.** Characteristics of Participants With Biological Result for SARS-CoV-2 Infection Stratified by Sex

**eTable 2.** Characteristics of Participants With Biological Result for SARS-CoV-2 Infection Stratified by Age

**eTable 3.** Characteristics of Participants With Positive Biological Result for SARS-CoV-2 Infection

**eFigure 2.** Estimates of Survival for All Symptoms Resolution

**eFigure 3.** Estimates of Survival for All Symptoms Resolution by Categories of Associated Factors

**eTable 4.** Hazard Ratio for Each Symptom Resolution

**eTable 5.** Sensitivity Analysis: Hazard Ratio for All Symptoms Resolution That Were Reported During the Follow-up

**eTable 6.** Sensitivity Analysis: Hazard Ratio for All Symptoms Resolution in the Overall Population and in the Subpopulation Defined by a Positive Serology

This supplementary material has been provided by the authors to give readers additional information about their work.

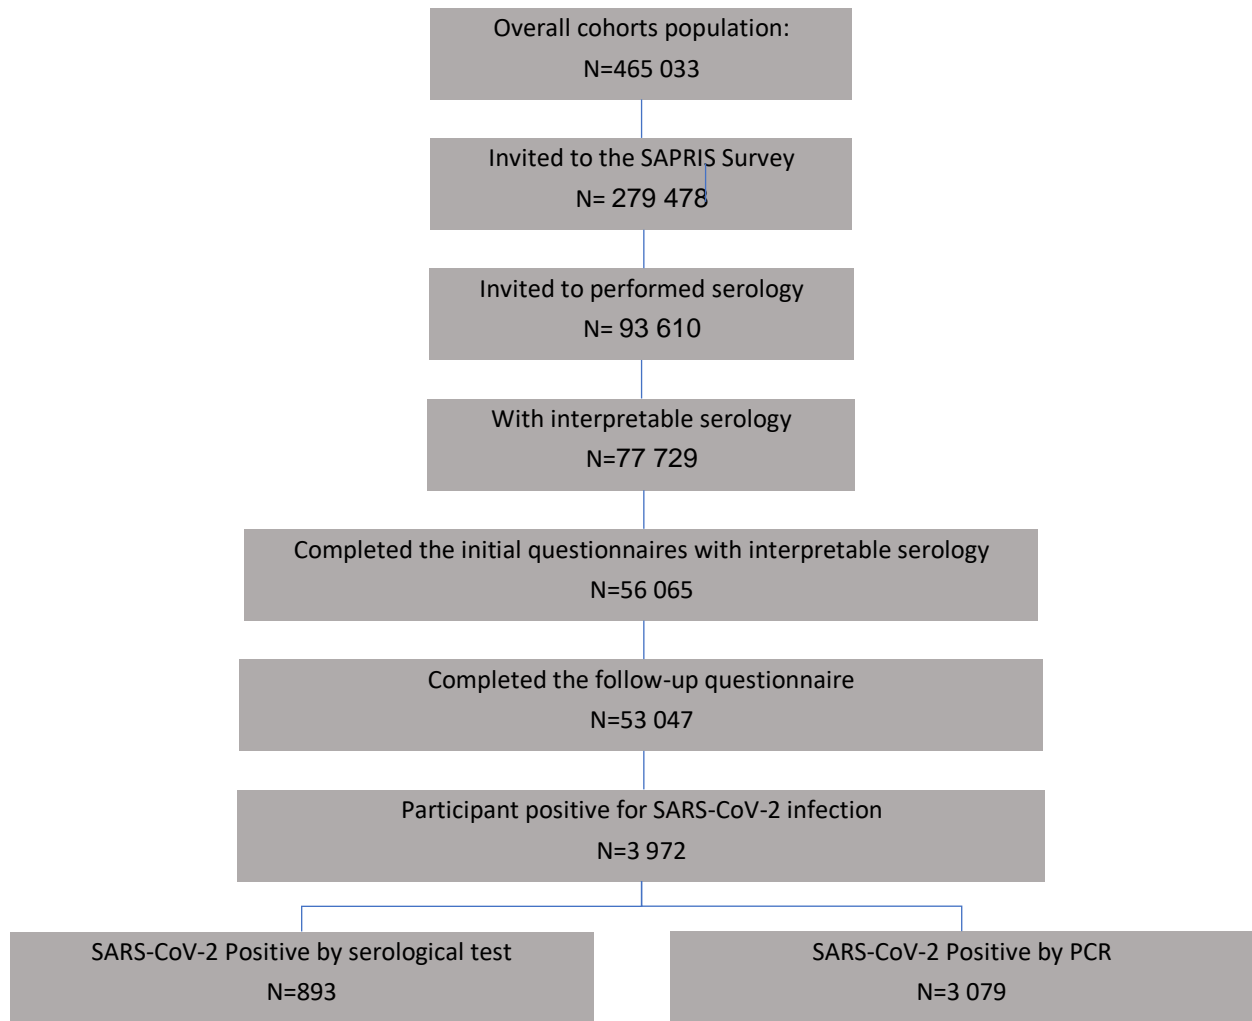

**eFigure 1.** Flowchart of the Study.

| Variables                                  | Male<br>N= 1441 (%) | Female<br>N=2531 (%) | p      |
|--------------------------------------------|---------------------|----------------------|--------|
| Age (SD)                                   | 52.0 (13.2)         | 50.2 (12.4)          | <0.001 |
| Chronic respiratory disease                | 54 (3.76)           | 204 (8.07)           | <0.001 |
| Anxiety/depression                         | 12 (0.84)           | 82 (3.24)            | <0.001 |
| Cancer                                     | 49 (3.41)           | 114 (4.51)           | 0.11   |
| HTA                                        | 108 (7.53)          | 156 (6.17)           | 0.11   |
| Diabetes mellitus                          | 29 (2.02)           | 44 (1.74)            | 0.61   |
| Chronic cardiological disorder             | 51 (3.55)           | 20 (0.79)            | <0.001 |
| BMI (Kg/m <sup>2</sup> ) (SD)              | 25.3 (3.95)         | 23.9 (4.46)          | <0.001 |
| History of tobacco consumption             | 708 (50.5)          | 1203 (48.8)          | 0.32   |
| Number of symptoms at the acute phase (SD) | 2.67 (2.92)         | 3.27 (3.26)          | <0.001 |
| Persistent symptoms                        | 212 (14.7)          | 649 (25.6)           | <0.001 |

**eTable 1.** Characteristics of Participants With Biological Result for SARS-CoV-2 Infection Stratified by Sex.

|                                            | Age≤40      | 40<Age≤60   | Age>60      | p      |
|--------------------------------------------|-------------|-------------|-------------|--------|
| Variables                                  | N=897 (%)   | N=2066 (%)  | N=1009 (%)  |        |
| Sex                                        | 593 (66.1)  | 1352 (65.4) | 586 (58.1)  | <0.001 |
| Chronic respiratory disease                | 39 (4.35)   | 106 (5.14)  | 113 (11.3)  | <0.001 |
| Anxiety/depression                         | 20 (2.23)   | 56 (2.71)   | 18 (1.79)   | 0.276  |
| Cancer                                     | 22 (2.46)   | 64 (3.10)   | 77 (7.67)   | <0.001 |
| HTA                                        | 4 (0.45)    | 99 (4.80)   | 161 (16.0)  | <0.001 |
| Diabetes mellitus                          | 2 (0.22)    | 19 (0.92)   | 52 (5.18)   | <0.001 |
| Chronic cardiological disorder             | 0 (0.00)    | 22 (1.07)   | 49 (4.88)   | <0.001 |
| History of tobacco consumption             | 362 (41.3)  | 963 (47.9)  | 586 (59.8)  | <0.001 |
| BMI (Kg/m <sup>2</sup> ) (SD)              | 23.5 (4.47) | 24.5 (4.35) | 24.9 (4.07) | <0.001 |
| Number of symptoms at the acute phase (SD) | 3.40 (3.31) | 3.18 (3.13) | 2.50 (2.99) | <0.001 |
| Persistent symptoms                        | 169 (18.9)  | 474 (22.9)  | 218 (21.6)  | 0.05   |

**eTable 2.** Characteristics of Participants with Biological Result for SARS-CoV-2 Infection Stratified by Age.

|                                       | <b>Asymptomatic<br/>infection<br/>N=1324</b> | <b>Symptomatic<br/>infection<br/>N=2648</b> | <b>p</b> |
|---------------------------------------|----------------------------------------------|---------------------------------------------|----------|
| <b>Age</b>                            |                                              |                                             | <0.001   |
| <40                                   | 273 (20.6%)                                  | 624 (23.6%)                                 |          |
| 40>age>=60                            | 641 (48.4%)                                  | 1425 (53.8%)                                |          |
| >60                                   | 410 (31.0%)                                  | 599 (22.6%)                                 |          |
| <b>Sex</b>                            |                                              |                                             | 0.041    |
| male                                  | 510 (38.5%)                                  | 931 (35.2%)                                 |          |
| female                                | 814 (61.5%)                                  | 1717 (64.8%)                                |          |
| <b>Anxiety/depression</b>             |                                              |                                             | 0.68     |
| No                                    | 1293 (97.8%)                                 | 2576 (97.5%)                                |          |
| Yes                                   | 29 (2.19%)                                   | 65 (2.46%)                                  |          |
| <b>Chronic respiratory disease</b>    |                                              |                                             | 0.38     |
| No                                    | 1229 (93.0%)                                 | 2476 (93.8%)                                |          |
| Yes                                   | 93 (7.03%)                                   | 165 (6.25%)                                 |          |
| <b>Cancer</b>                         |                                              |                                             | 0.88     |
| No                                    | 1269 (96.0%)                                 | 2531 (95.8%)                                |          |
| Yes                                   | 53 (4.01%)                                   | 110 (4.17%)                                 |          |
| <b>HTA</b>                            |                                              |                                             | 0.002    |
| No                                    | 1211 (91.6%)                                 | 2488 (94.2%)                                |          |
| Yes                                   | 111 (8.40%)                                  | 153 (5.79%)                                 |          |
| <b>Diabetes mellitus</b>              |                                              |                                             | 0.59     |
| No                                    | 1295 (98.0%)                                 | 2595 (98.3%)                                |          |
| Yes                                   | 27 (2.04%)                                   | 46 (1.74%)                                  |          |
| <b>Chronic cardiological disorder</b> |                                              |                                             | 0.22     |
| No                                    | 1293 (97.8%)                                 | 2599 (98.4%)                                |          |
| Yes                                   | 29 (2.19%)                                   | 42 (1.59%)                                  |          |
| <b>History of tobacco consumption</b> |                                              |                                             | 0.61     |
| No                                    | 655 (51.2%)                                  | 1302 (50.3%)                                |          |
| Yes                                   | 624 (48.8%)                                  | 1287 (49.7%)                                |          |
| <b>BMI</b>                            |                                              |                                             | 0.58     |
| <=25                                  | 817 (63.4%)                                  | 1651 (64.3%)                                |          |
| 25<BMI<=30                            | 351 (27.3%)                                  | 662 (25.8%)                                 |          |
| BMI>=30                               | 120 (9.32%)                                  | 254 (9.89%)                                 |          |
| <b>Number of acute symptoms</b>       |                                              |                                             | -        |
| <=4                                   | -                                            | 1467 (55.4%)                                |          |
| >4                                    | -                                            | 1181 (44.6%)                                |          |

**eTable 3.** Characteristics of Participants with Positive Biological Result for SARS-CoV-2 Infection.

**Semi-parametric Fit for all participants with acute symptoms**

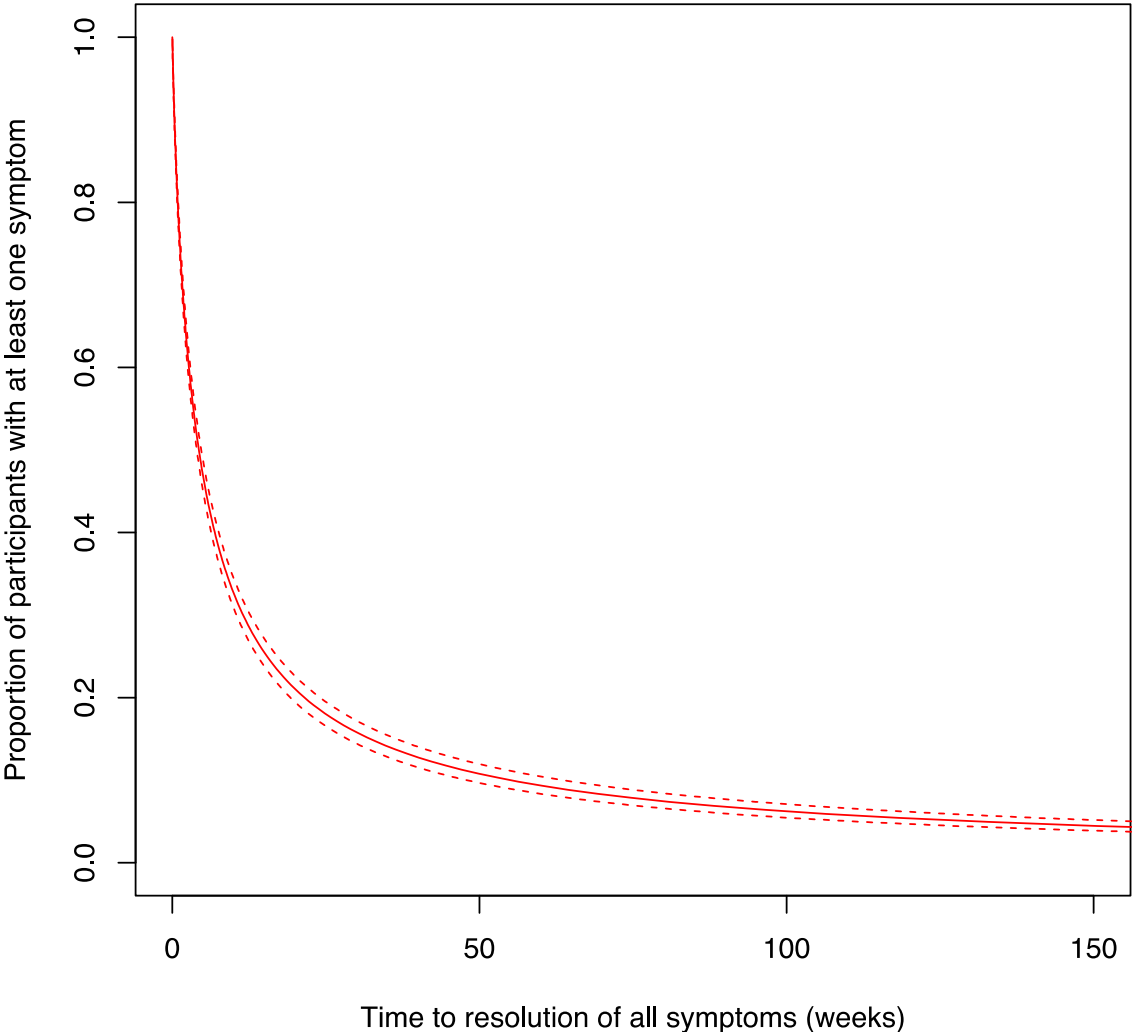

**eFigure 2.** Estimates of Survival for All Symptoms Resolution.

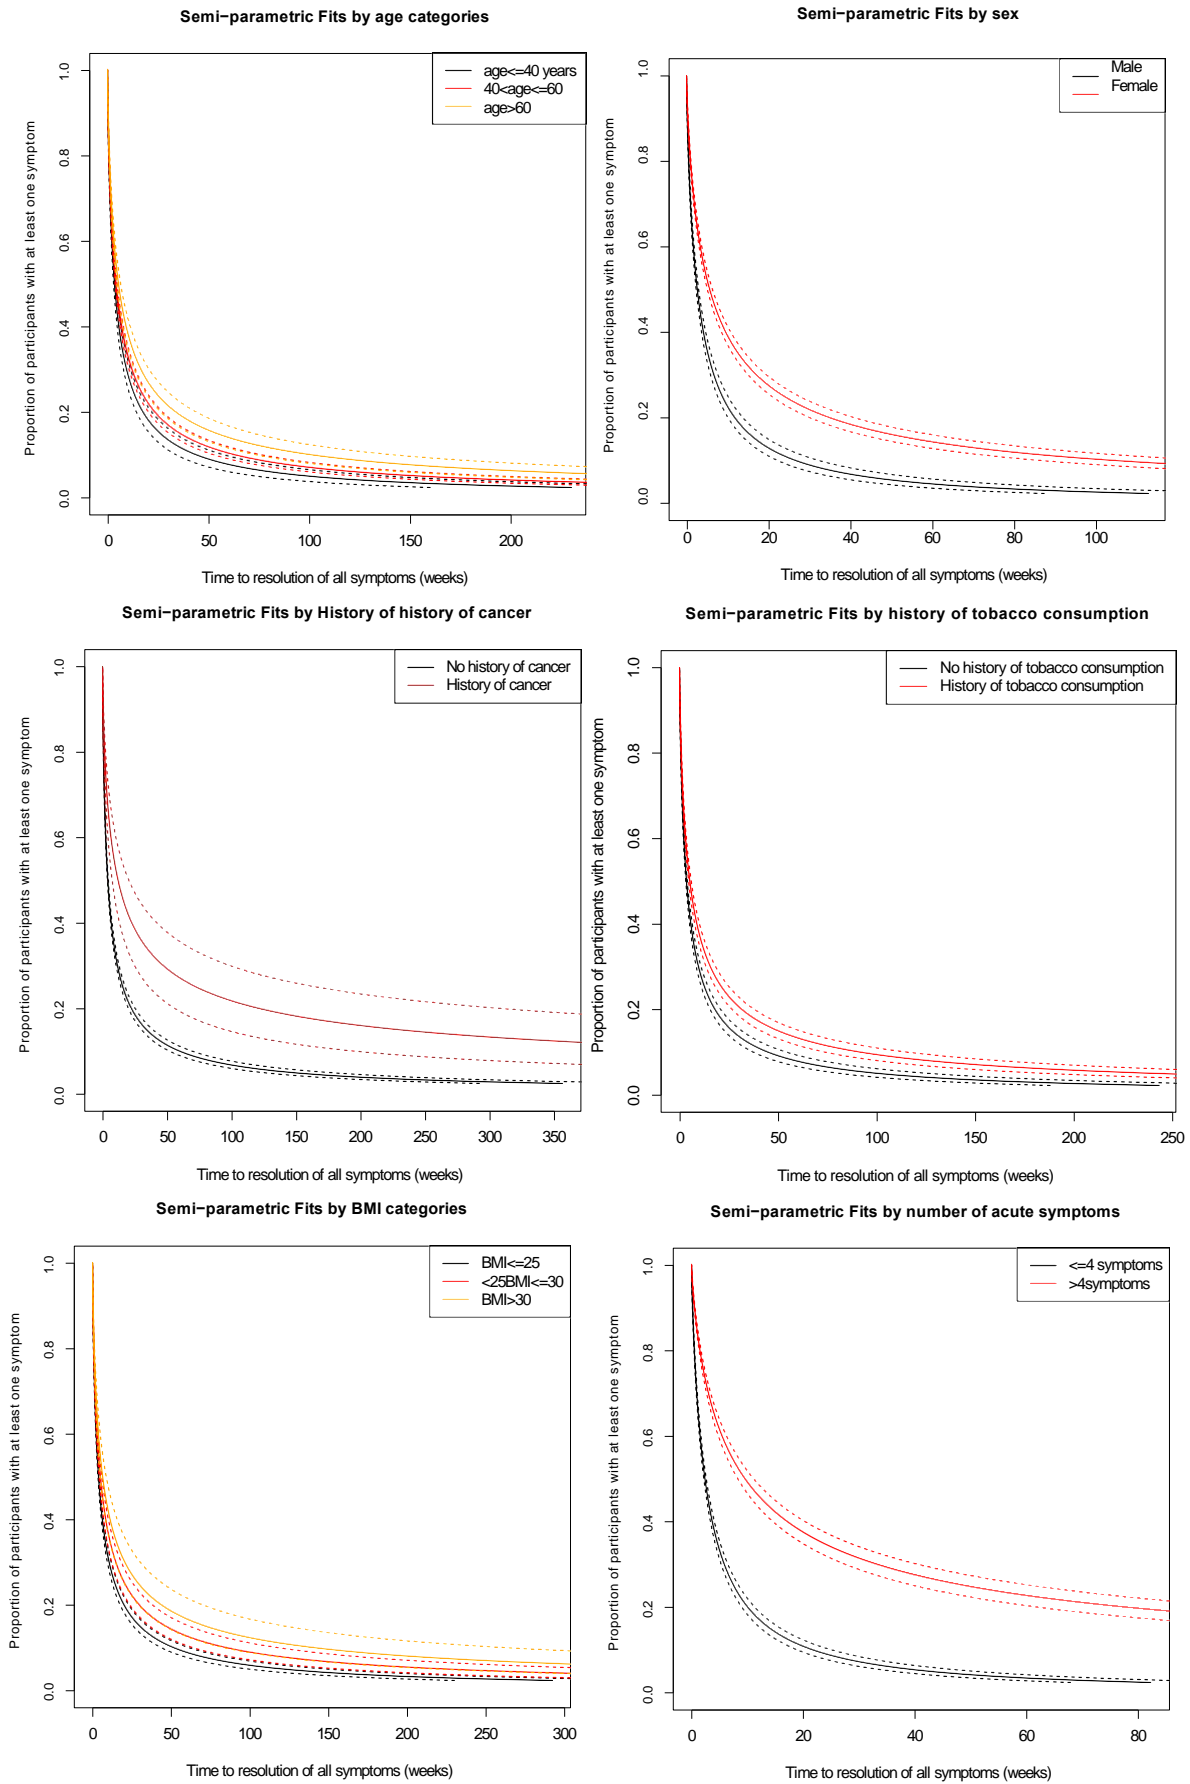

**eFigure 3.** Estimates of Survival for All Symptoms Resolution by Categories of Associated Factors.

| Variables                                     | Cough<br>aHR [95%CI]    | Dyspnea<br>aHR [95%CI]  | Thoracic pain<br>aHR [95%CI] | Palpitation<br>aHR [95%CI] | Articular pain<br>aHR [95%CI] | Myalgia<br>aHR [95%CI]  |
|-----------------------------------------------|-------------------------|-------------------------|------------------------------|----------------------------|-------------------------------|-------------------------|
| <b>(base=&lt;40)</b>                          |                         |                         |                              |                            |                               |                         |
| 40>age>=60                                    | <b>0.71 [0.61-0.83]</b> | 0.91 [0.71-1.15]        | 0.81 [0.6-1.1]               | 0.87 [0.53-1.44]           | <b>0.67 [0.49-0.93]</b>       | <b>0.75 [0.65-0.87]</b> |
| >60                                           | <b>0.55 [0.45-0.67]</b> | 0.82 [0.6-1.13]         | 0.87 [0.59-1.3]              | 0.62 [0.31-1.25]           | <b>0.43 [0.28-0.66]</b>       | <b>0.63 [0.52-0.75]</b> |
| <b>Sex (base= male)</b>                       | <b>0.84 [0.73-0.96]</b> | <b>0.70 [0.57-0.87]</b> | 0.90 [0.7-1.17]              | 0.96 [0.55-1.68]           | 0.82 [0.61-1.1]               | 0.92 [0.81-1.05]        |
| <b>Anxiety/depression</b>                     | 1.21 [0.76-1.92]        | 0.66 [0.36-1.19]        | 0.93 [0.43-2.01]             | 1.39 [0.66-2.91]           | 0.58 [0.25-1.3]               | 0.77 [0.5-1.18]         |
| <b>Chronic respiratory disease</b>            | 0.84 [0.62-1.13]        | 0.82 [0.56-1.21]        | 1.31 [0.79-2.17]             | 0.92 [0.37-2.31]           | 0.7 [0.4-1.23]                | 0.92 [0.68-1.25]        |
| <b>History of cancer</b>                      | 1.22 [0.79-1.87]        | 0.76 [0.46-1.26]        | 0.69 [0.42-1.14]             | 0.54 [0.07-3.94]           | 0.62 [0.29-1.3]               | <b>0.69 [0.49-0.97]</b> |
| <b>HTA</b>                                    | 1.01 [0.73-1.4]         | 0.98 [0.6-1.61]         | 0.89 [0.08-9.91]             | 0.62 [0.12-3.25]           | 1.19 [0.67-2.13]              | 0.88 [0.68-1.13]        |
| <b>Diabetes mellitus</b>                      | 0.68 [0.38-1.21]        | 0.83 [0.34-2.01]        | -                            | 1.43 [0.03-58.69]          | 0.59 [0.01-59.94]             | 0.53 [0.05-5.63]        |
| <b>Chronic cardiological disorder</b>         | 0.76 [0.44-1.31]        | 0.76 [0.41-1.41]        | -                            | 0.82 [0-487.33]            | 1.34 [0.03-67.61]             | 0.79 [0.5-1.25]         |
| <b>History of tobacco consumption</b>         | 0.96 [0.84-1.1]         | 0.95 [0.78-1.15]        | 1.03 [0.81-1.3]              | 0.98 [0.64-1.52]           | 0.91 [0.7-1.18]               | 0.96 [0.85-1.08]        |
| <b>BMI (base: &lt;=25)</b>                    |                         |                         |                              |                            |                               |                         |
| 25<BMI<=30                                    | 0.92 [0.78-1.07]        | 0.82 [0.64-1.05]        | 0.91 [0.68-1.22]             | 0.79 [0.46-1.35]           | 1.07 [0.78-1.47]              | 0.90 [0.78-1.04]        |
| BMI>=30                                       | <b>0.77 [0.61-0.96]</b> | 0.77 [0.56-1.05]        | 0.74 [0.47-1.18]             | 1.08 [0.58-2.02]           | 0.72 [0.5-1.03]               | <b>0.73 [0.59-0.89]</b> |
| <b>Number of acute symptoms (base=&lt;=4)</b> | <b>0.84 [0.73-0.96]</b> | 1.12 [0.88-1.42]        | 0.79 [0.56-1.11]             | 1.29 [0.65-2.55]           | 1.11 [0.75-1.65]              | <b>0.74 [0.65-0.85]</b> |

| Variables                                     | Headache<br>aHR [95%CI] | Anosmia/ageusia<br>aHR [95%CI] | Fever<br>aHR [95%CI]    | Diarrhoea<br>aHR [95%CI] | Nausea<br>aHR [95%CI] |
|-----------------------------------------------|-------------------------|--------------------------------|-------------------------|--------------------------|-----------------------|
| <b>age (base: &lt;=40 years)</b>              |                         |                                |                         |                          |                       |
| 40>age>=60                                    | 0.94 [0.82-1.07]        | 1.05 [0.88-1.25]               | <b>0.78 [0.68-0.89]</b> | 0.86 [0.64-1.17]         | 0.79 [0.57-1.08]      |
| >60                                           | 0.89 [0.75-1.07]        | 0.96 [0.75-1.21]               | <b>0.63 [0.52-0.75]</b> | 0.96 [0.67-1.37]         | 0.72 [0.49-1.06]      |
| <b>Sex (base= male)</b>                       | <b>0.80 [0.7-0.91]</b>  | <b>0.77 [0.66-0.91]</b>        | 1.04 [0.92-1.16]        | 0.89 [0.68-1.17]         | 0.71 [0.51-1]         |
| <b>anxiety/depression</b>                     | 0.89 [0.66-1.21]        | 0.86 [0.49-1.51]               | <b>0.67 [0.48-0.94]</b> | 0.53 [0.25-1.14]         | 0.67 [0.39-1.12]      |
| <b>Chronic respiratory disease</b>            | 0.84 [0.65-1.07]        | 0.98 [0.65-1.47]               | 1.10 [0.86-1.4]         | 0.79 [0.49-1.28]         | 1.01 [0.58-1.75]      |
| <b>History of cancer</b>                      | 0.95 [0.7-1.28]         | 0.94 [0.57-1.55]               | 0.77 [0.57-1.04]        | 1.04 [0.63-1.71]         | 0.74 [0.39-1.39]      |
| <b>HTA</b>                                    | 0.98 [0.76-1.25]        | 0.89 [0.57-1.39]               | 0.93 [0.73-1.19]        | 0.83 [0.5-1.39]          | 0.93 [0.49-1.78]      |
| <b>Diabetes mellitus</b>                      | 1.10 [0.56-2.15]        | 1.53 [0.01-259.9]              | 1.38 [0.92-2.09]        | -                        | -                     |
| <b>Chronic cardiological disorder</b>         | 0.92 [0.55-1.55]        | -                              | 0.73 [0.49-1.07]        | -                        | -                     |
| <b>History of tobacco consumption</b>         | 0.90 [0.81-1.01]        | 0.90 [0.78-1.05]               | 0.97 [0.86-1.09]        | 0.97 [0.77-1.23]         | 0.86 [0.64-1.17]      |
| <b>BMI (base: &lt;=25)</b>                    |                         |                                |                         |                          |                       |
| 25<BMI<=30                                    | <b>0.88 [0.77-0.99]</b> | 0.89 [0.74-1.06]               | <b>0.83 [0.73-0.95]</b> | 0.85 [0.64-1.13]         | 0.90 [0.65-1.25]      |
| BMI>=30                                       | <b>0.74 [0.61-0.9]</b>  | 0.85 [0.63-1.15]               | <b>0.66 [0.54-0.79]</b> | 0.95 [0.68-1.32]         | 1.10 [0.72-1.66]      |
| <b>Number of acute symptoms (base=&lt;=4)</b> | <b>0.84 [0.75-0.95]</b> | 1.06 [0.91-1.24]               | <b>0.80 [0.71-0.9]</b>  | 1.09 [0.81-1.47]         | 1.13 [0.8-1.6]        |

**eTable 4. Hazard Ratio for Each Symptom Resolution. aHR: Hazard Ratio; CI: confidence interval. Results with p<0.05 are in bold.**



| Variables                                         | Asthenia<br>aHR [95%CI] | Attention/<br>Concentration<br>disorders<br>aHR [95%CI] | Memory loss<br>aHR [95%CI] | Sleep disorder<br>aHR [95%CI] |
|---------------------------------------------------|-------------------------|---------------------------------------------------------|----------------------------|-------------------------------|
| <b>age (base: &lt;=40 years)</b>                  |                         |                                                         |                            |                               |
| 40>age>=60                                        | <b>0.69 [0.61-0.79]</b> | 0.76 [0.57-1.03]                                        | 1.04 [0.55-1.98]           | 0.83 [0.58-1.17]              |
| >60                                               | <b>0.65 [0.55-0.77]</b> | 0.56 [0.38-0.83]                                        | 0.42 [0.16-1.07]           | 0.86 [0.58-1.26]              |
| <b>Sex (base= male)</b>                           | <b>0.65 [0.58-0.73]</b> | 0.76 [0.57-1.01]                                        | 0.62 [0.31-1.22]           | <b>0.6 [0.43-0.82]</b>        |
| <b>anxiety/depression</b>                         | <b>0.52 [0.34-0.8]</b>  | 0.48 [0.22-1.06]                                        | -                          | 0.47 [0.1-2.21]               |
| <b>Chronic respiratory disease</b>                | 0.86 [0.66-1.13]        | 0.93 [0.48-1.79]                                        | -                          | 1.19 [0.66-2.14]              |
| <b>History of cancer</b>                          | <b>0.61 [0.44-0.84]</b> | 0.50 [0.25-1.03]                                        | -                          | 0.73 [0.32-1.67]              |
| <b>HTA</b>                                        | 0.96 [0.74-1.24]        | 1.71 [0.7-4.19]                                         | -                          | 1.89 [0.98-3.65]              |
| <b>Diabetes mellitus</b>                          | <b>0.57 [0.33-0.98]</b> | -                                                       | -                          | 0.69 [0.01-52.92]             |
| <b>Chronic cardiological disorder</b>             | 0.94 [0.59-1.48]        | -                                                       | -                          | 1.05 [0.1-11.4]               |
| <b>History of tobacco consumption</b>             | <b>0.88 [0.79-0.99]</b> | 1.06 [0.81-1.38]                                        | 1.26 [0.8-1.98]            | <b>0.74 [0.55-0.99]</b>       |
| <b>BMI (base: &lt;=25)</b>                        |                         |                                                         |                            |                               |
| 25<BMI<=30                                        | <b>0.85 [0.74-0.97]</b> | 1.20 [0.87-1.66]                                        | 0.80 [0.39-1.62]           | 0.76 [0.54-1.07]              |
| BMI>=30                                           | <b>0.76 [0.63-0.93]</b> | 1.13 [0.71-1.81]                                        | 1.49 [0.88-2.51]           | 0.68 [0.41-1.1]               |
| <b>Number of acute symptoms<br/>(base=&lt;=4)</b> | <b>0.58 [0.51-0.65]</b> | 0.95 [0.57-1.59]                                        | 0.65 [0.37-1.16]           | 1.65 [1.13-2.41]              |

**eTable 4.** Hazard Ratio for Each Symptom Resolution. **aHR: Hazard Ratio; CI: confidence interval. Results with  $p < 0.05$  are in bold**

| Variables                                     | aHR (%95%)       | p      |
|-----------------------------------------------|------------------|--------|
| <b>Age (base: &lt;=40 years)</b>              |                  |        |
| 40>age>=60                                    | 0.8 [0.71-0.9]   | <0.001 |
| >60                                           | 0.78 [0.67-0.91] | 0.001  |
| <b>Sex (base= male)</b>                       | 0.64 [0.58-0.71] | <0.001 |
| <b>Anxiety/depression</b>                     | 0.61 [0.4-0.92]  | 0.02   |
| <b>Chronic respiratory disease</b>            | 0.95 [0.75-1.2]  | 0.66   |
| <b>Cancer</b>                                 | 0.65 [0.49-0.86] | 0.003  |
| <b>HTA</b>                                    | 0.97 [0.75-1.24] | 0.78   |
| <b>Diabetes mellitus</b>                      | 0.71 [0.41-1.21] | 0.21   |
| <b>Chronic cardiological disorder</b>         | 0.77 [0.49-1.22] | 0.27   |
| <b>History of tobacco consumption</b>         | 0.85 [0.77-0.94] | 0.001  |
| <b>BMI (base: &lt;=25)</b>                    |                  |        |
| 25<BMI<=30                                    | 0.86 [0.76-0.97] | 0.01   |
| BMI>=30                                       | 0.78 [0.65-0.95] | 0.10   |
| <b>Number of acute symptoms (base=&lt;=4)</b> | 0.52 [0.47-0.58] | <0.001 |

**eTable 5.** Sensitivity Analysis: Hazard Ratio for All Symptoms Resolution That Were Reported During the Follow-up. aHR: adjusted Hazard Ratio; CI: confidence interval. 2835 (71.4%) individuals with a positive biological test result declared at least one symptom during the follow-up.

| Variables                                     | Results of the survey (PCR + serology)<br>aHR [95%CI] | p      | Sensitivity analysis (serology only)<br>aHR [95%CI] | p     |
|-----------------------------------------------|-------------------------------------------------------|--------|-----------------------------------------------------|-------|
| <b>Age</b>                                    |                                                       |        |                                                     |       |
| 40>age>=60                                    | 0.88 [0.78-0.99]                                      | 0.03   | 0.55 [0.33-1.15]                                    | 0.12  |
| >60                                           | 0.79 [0.67-0.92]                                      | 0.003  | 0.43 [0.19-0.92]                                    | 0.01  |
| <b>Sex (base= male)</b>                       | 0.67 [0.61-0.75]                                      | <0.001 | 0.80 [0.48-1.20]                                    | 0.31  |
| <b>Anxiety/depression</b>                     | 0.73 [0.51-1.06]                                      | 0.12   | -                                                   | -     |
| <b>Chronic respiratory disease</b>            | 0.83 [0.65-1.05]                                      | 0.10   | 0.22 [0.10-0.98]                                    | 0.03  |
| <b>Cancer</b>                                 | 0.68 [0.52-0.90]                                      | 0.007  |                                                     |       |
| <b>HTA</b>                                    | 0.94 [0.74-1.18]                                      | 0.57   | 0.64 [0.25-1.83]                                    | 0.64  |
| <b>Diabetes mellitus</b>                      | 0.76 [0.46-1.28]                                      | 0.30   | -                                                   | -     |
| <b>Chronic cardiological disorder</b>         | 0.84 [0.52-1.35]                                      | 0.47   | -                                                   | -     |
| <b>History of tobacco consumption</b>         | 0.87 [0.79-0.97]                                      | 0.88   | 0.92 [0.52-1.59]                                    | 0.94  |
| <b>BMI (base: &lt;=25)</b>                    |                                                       |        |                                                     |       |
| 25<BMI<=30                                    | 0.85 [0.75-0.96]                                      | 0.01   | 0.47 [0.25-0.90]                                    | 0.003 |
| BMI>=30                                       | 0.82 [0.68-0.97]                                      | 0.03   | 0.55 [0.26-0.95]                                    | 0.03  |
| <b>Number of acute symptoms (base=&lt;=4)</b> | 0.45 [0.41-0.5]                                       | <0.001 | 0.90 [0.47-0.1.10]                                  | 0.56  |

**eTable 6.** Sensitivity Analysis: Hazard Ratio for All Symptoms Resolution in the Overall Population and in the Subpopulation Defined by a Positive Serology
