# Supplementary material for: Long-lasting Symptoms After an Acute COVID-19 Infection and Factors Associated With Their Resolution
Source: PubMed Central journal article supplement (PMC9647489; doi:10.1001/jamanetworkopen.2022.40985), 2022-11-09
Supplement: jamanetwopen-e2240985-s002.pdf [file jamanetwopen-e2240985-s002.pdf]

\*First name, last name, and suffix (if applicable) are required and will appear in PubMed.

| <b>*Group Name(s): Santé, Pratiques, Relations et Inégalités Sociales en Population Générale Pendant la Crise COVID-19–Sérologie (SAPRIS-SERO) Study Group</b> |                 |                       |                  |                                                                                                                                                                                                            |                                          |                                                         |                                                                                            |
|----------------------------------------------------------------------------------------------------------------------------------------------------------------|-----------------|-----------------------|------------------|------------------------------------------------------------------------------------------------------------------------------------------------------------------------------------------------------------|------------------------------------------|---------------------------------------------------------|--------------------------------------------------------------------------------------------|
| *First Name and Middle Initial(s)                                                                                                                              | *Last Name      | *Suffix (eg, Jr, III) | Academic Degrees | Institution                                                                                                                                                                                                | Location (city, state/province, country) | Role or Contribution, eg, chair, principal investigator | Group (if more than 1 Group listed in the byline) and/or Subgroup (eg, Steering Committee) |
| Fabrice                                                                                                                                                        | Carrat          |                       | PhD              | Institut Pierre-Louis d'Épidémiologie et de Santé Publique, Sorbonne Université, Inserm, Département de santé publique, Hôpital Saint-Antoine, APHP, 27 rue Chaligny, 75571 Paris Cedex 12, France         | Paris                                    | PI                                                      |                                                                                            |
| Marie                                                                                                                                                          | Zins            |                       | PhD              | UVSQ, Inserm UMS 11, Université Paris-Saclay, Université de Paris, Villejuif, France                                                                                                                       | Villejuif                                |                                                         |                                                                                            |
| Gianluca                                                                                                                                                       | Severi          |                       | PhD              | CESP UMR1018, UVSQ, Inserm, Université Paris-Saclay, Gustave Roussy, Villejuif, France                                                                                                                     | Paris                                    |                                                         |                                                                                            |
| Mathilde                                                                                                                                                       | Touvier         |                       | PhD              | Inserm U1153, Inrae U1125, Cnam, Nutritional Epidemiology Research Team (EREN), Sorbonne Paris Nord University, Epidemiology and Statistics Research Center – University of Paris (CRESS), Bobigny, France | Paris                                    |                                                         |                                                                                            |
| Hélène                                                                                                                                                         | Blanché         |                       | PhD              | Fondation Jean Dausset-CEPH (Centre d'Etude du Polymorphisme Humain), CEPH-Biobank, Paris, France                                                                                                          | Paris                                    |                                                         |                                                                                            |
| Jean-François                                                                                                                                                  | Deleuze         |                       | PhD              | Fondation Jean Dausset-CEPH (Centre d'Etude du Polymorphisme Humain), CEPH-Biobank, Paris, France                                                                                                          | Paris                                    |                                                         |                                                                                            |
| Xavier                                                                                                                                                         | De Lambalerie   |                       | PhD              | Unité des Virus Émergents, UVE, IRD 190, INSERM 1207, Aix Marseille Univ, IHU Méditerranée Infection, Marseille, France                                                                                    | Marseille                                |                                                         |                                                                                            |
| Clovis                                                                                                                                                         | Lusivika-Nzinga |                       |                  | Institut Pierre-Louis d'Épidémiologie et de Santé Publique, Sorbonne Université, Inserm, Département de santé publique, Hôpital Saint-Antoine, APHP, 27 rue Chaligny, 75571 Paris Cedex 12, France         | Paris                                    |                                                         |                                                                                            |

## Supplemental Online Content: Nonauthor Collaborators

\*First name, last name, and suffix (if applicable) are required and will appear in PubMed.

| *First Name and Middle Initial(s) | *Last Name | *Suffix (eg, Jr, III) | Academic Degrees | Institution                                                                                                                                                                                        | Location (city, state/province, country) | Role or Contribution, eg, chair, principal investigator | Group (if more than 1 Group listed in the byline) and/or Subgroup (eg, Steering Committee) |
|-----------------------------------|------------|-----------------------|------------------|----------------------------------------------------------------------------------------------------------------------------------------------------------------------------------------------------|------------------------------------------|---------------------------------------------------------|--------------------------------------------------------------------------------------------|
| Gregory                           | Pannetier  |                       | PhD              | Institut Pierre-Louis d'Épidémiologie et de Santé Publique, Sorbonne Université, Inserm, Département de santé publique, Hôpital Saint-Antoine, APHP, 27 rue Chaligny, 75571 Paris Cedex 12, France | Paris                                    |                                                         |                                                                                            |
| Nathanael                         | Lapidus    |                       | PhD              | nstitut Pierre-Louis d'Épidémiologie et de Santé Publique, Sorbonne Université, Inserm, Département de santé publique, Hôpital Saint-Antoine, APHP, 27 rue Chaligny, 75571 Paris Cedex 12, France  | Paris                                    |                                                         |                                                                                            |
| Isabelle                          | Goderel    |                       |                  | nstitut Pierre-Louis d'Épidémiologie et de Santé Publique, Sorbonne Université, Inserm, Département de santé publique, Hôpital Saint-Antoine, APHP, 27 rue Chaligny, 75571 Paris Cedex 12, France  | Paris                                    |                                                         |                                                                                            |
| Céline                            | Dorival    |                       | PhD              | nstitut Pierre-Louis d'Épidémiologie et de Santé Publique, Sorbonne Université, Inserm, Département de santé publique, Hôpital Saint-Antoine, APHP, 27 rue Chaligny, 75571 Paris Cedex 12, France  | Paris                                    |                                                         |                                                                                            |
| Jerome                            | Nicol      |                       |                  | nstitut Pierre-Louis d'Épidémiologie et de Santé Publique, Sorbonne Université, Inserm, Département de santé publique, Hôpital Saint-Antoine, APHP, 27 rue Chaligny, 75571 Paris Cedex 12, France  | Paris                                    |                                                         |                                                                                            |
| Olvier                            | Robineau   |                       | PhD              | nstitut Pierre-Louis d'Épidémiologie et de Santé Publique, Sorbonne Université, Inserm, Département de santé publique, Hôpital Saint-Antoine, APHP, 27 rue Chaligny, 75571 Paris Cedex 12, France  | Paris                                    |                                                         |                                                                                            |
| Sofiane                           | Kab        |                       | PhD              | UVSQ, Inserm UMS 11, Université Paris-Saclay, Université de Paris, Villejuif, France                                                                                                               | Villejuif                                |                                                         |                                                                                            |

## Supplemental Online Content: Nonauthor Collaborators

\*First name, last name, and suffix (if applicable) are required and will appear in PubMed.

| *First Name and Middle Initial(s) | *Last Name | *Suffix (eg, Jr, III) | Academic Degrees | Institution                                                                            | Location (city, state/province, country) | Role or Contribution, eg, chair, principal investigator | Group (if more than 1 Group listed in the byline) and/or Subgroup (eg, Steering Committee) |
|-----------------------------------|------------|-----------------------|------------------|----------------------------------------------------------------------------------------|------------------------------------------|---------------------------------------------------------|--------------------------------------------------------------------------------------------|
| Adeline                           | Renuy      |                       |                  | UVSQ, Inserm UMS 11, Université Paris-Saclay, Université de Paris, Villejuif, France   | Villejuif                                |                                                         |                                                                                            |
| Stéphane                          | Le-Got     |                       |                  | UVSQ, Inserm UMS 11, Université Paris-Saclay, Université de Paris, Villejuif, France   | Villejuif                                |                                                         |                                                                                            |
| Céline                            | Ribet      |                       |                  | UVSQ, Inserm UMS 11, Université Paris-Saclay, Université de Paris, Villejuif, France   | Villejuif                                |                                                         |                                                                                            |
| Miereille                         | Pellicer   |                       |                  | UVSQ, Inserm UMS 11, Université Paris-Saclay, Université de Paris, Villejuif, France   | Villejuif                                |                                                         |                                                                                            |
| Emmanuel                          | Wiernik    |                       |                  | UVSQ, Inserm UMS 11, Université Paris-Saclay, Université de Paris, Villejuif, France   | Villejuif                                |                                                         |                                                                                            |
| Marcel                            | Goldberg   |                       | PhD              | UVSQ, Inserm UMS 11, Université Paris-Saclay, Université de Paris, Villejuif, France   | Villejuif                                |                                                         |                                                                                            |
| Fanny                             | Artaud     |                       |                  | CESP UMR1018, UVSQ, Inserm, Université Paris-Saclay, Gustave Roussy, Villejuif, France | Villejuif                                |                                                         |                                                                                            |
| Pascale                           | Gerbouin-  |                       |                  | CESP UMR1018, UVSQ, Inserm, Université Paris-                                          | Villejuif                                |                                                         |                                                                                            |
| Mélodie                           | nguix      |                       |                  | CESP UMR1018, UVSQ, Inserm, Université Paris-Saclay, Gustave Roussy, Villejuif, France | Villejuif                                |                                                         |                                                                                            |
| Camille                           | Laplanche  |                       |                  | CESP UMR1018, UVSQ, Inserm, Université Paris-Saclay, Gustave Roussy, Villejuif, France | Villejuif                                |                                                         |                                                                                            |
| Roselyn                           | Gomes-Rima |                       |                  | CESP UMR1018, UVSQ, Inserm, Université Paris-Saclay, Gustave Roussy, Villejuif, France | Villejuif                                |                                                         |                                                                                            |
| Lyan                              | Hoang      |                       |                  | CESP UMR1018, UVSQ, Inserm, Université Paris-Saclay, Gustave Roussy, Villejuif, France | Villejuif                                |                                                         |                                                                                            |
| Emmanuelle                        | Correia    |                       |                  | CESP UMR1018, UVSQ, Inserm, Université Paris-Saclay, Gustave Roussy, Villejuif, France | Villejuif                                |                                                         |                                                                                            |
| Alpha Amadou                      | Barry      |                       |                  | CESP UMR1018, UVSQ, Inserm, Université Paris-Saclay, Gustave Roussy, Villejuif, France | Villejuif                                |                                                         |                                                                                            |
| Nadège                            | Senina     |                       |                  | CESP UMR1018, UVSQ, Inserm, Université Paris-Saclay, Gustave Roussy, Villejuif, France | Villejuif                                |                                                         |                                                                                            |

Supplemental Online Content: Nonauthor Collaborators

\*First name, last name, and suffix (if applicable) are required and will appear in PubMed.

| *First Name and Middle Initial(s) | *Last Name        | *Suffix (eg, Jr, III) | Academic Degrees | Institution                                                                                                                                                                                               | Location (city, state/province, country) | Role or Contribution, eg, chair, principal investigator | Group (if more than 1 Group listed in the byline) and/or Subgroup (eg, Steering Committee) |
|-----------------------------------|-------------------|-----------------------|------------------|-----------------------------------------------------------------------------------------------------------------------------------------------------------------------------------------------------------|------------------------------------------|---------------------------------------------------------|--------------------------------------------------------------------------------------------|
| Julien                            | Allegre           |                       |                  | nserm U1153, Inrae U1125, Cnam, Nutritional Epidemiology Research Team (EREN), Sorbonne Paris Nord University, Epidemiology and Statistics Research Center – University of Paris (CRESS), Bobigny, France | Bobigny                                  |                                                         |                                                                                            |
| Fabien                            | Szabo de Edelenyi |                       |                  | nserm U1153, Inrae U1125, Cnam, Nutritional Epidemiology Research Team (EREN), Sorbonne Paris Nord University, Epidemiology and Statistics Research Center – University of Paris (CRESS), Bobigny, France | Bobigny                                  |                                                         |                                                                                            |
| Nathalie                          | Druesne-Pecollo   |                       | PhD              | nserm U1153, Inrae U1125, Cnam, Nutritional Epidemiology Research Team (EREN), Sorbonne Paris Nord University, Epidemiology and Statistics Research Center – University of Paris (CRESS), Bobigny, France | Bobigny                                  |                                                         |                                                                                            |
| Yunes                             | Esseddik          |                       | PhD              | nserm U1153, Inrae U1125, Cnam, Nutritional Epidemiology Research Team (EREN), Sorbonne Paris Nord University, Epidemiology and Statistics Research Center – University of Paris (CRESS), Bobigny, France | Bobigny                                  |                                                         |                                                                                            |
| Serge                             | Hercberg          |                       |                  | nserm U1153, Inrae U1125, Cnam, Nutritional Epidemiology Research Team (EREN), Sorbonne Paris Nord University, Epidemiology and Statistics Research Center – University of Paris (CRESS), Bobigny, France | Bobigny                                  |                                                         |                                                                                            |
| Mélanie                           | Deschasaux        |                       |                  | nserm U1153, Inrae U1125, Cnam, Nutritional Epidemiology Research Team (EREN), Sorbonne Paris Nord University, Epidemiology and Statistics Research Center – University of Paris (CRESS), Bobigny, France | Bobigny                                  |                                                         |                                                                                            |

## Supplemental Online Content: Nonauthor Collaborators

\*First name, last name, and suffix (if applicable) are required and will appear in PubMed.

| *First Name and Middle Initial(s) | *Last Name      | *Suffix (eg, Jr, III) | Academic Degrees | Institution                                                                                                             | Location (city, state/province, country) | Role or Contribution, eg, chair, principal investigator | Group (if more than 1 Group listed in the byline) and/or Subgroup (eg, Steering Committee) |
|-----------------------------------|-----------------|-----------------------|------------------|-------------------------------------------------------------------------------------------------------------------------|------------------------------------------|---------------------------------------------------------|--------------------------------------------------------------------------------------------|
| Jean-Marc                         | Sébaoun         |                       |                  | Fondation Jean Dausset-CEPH (Centre d'Etude du Polymorphisme Humain), CEPH-Biobank, Paris, France                       | Paris                                    |                                                         |                                                                                            |
| Jean-Christophe                   | Baudouin        |                       |                  | Fondation Jean Dausset-CEPH (Centre d'Etude du Polymorphisme Humain), CEPH-Biobank, Paris, France                       | Paris                                    |                                                         |                                                                                            |
| Laetitia                          | Gressin         |                       |                  | Fondation Jean Dausset-CEPH (Centre d'Etude du Polymorphisme Humain), CEPH-Biobank, Paris, France                       | Paris                                    |                                                         |                                                                                            |
| Valérie                           | Morel           |                       |                  | Fondation Jean Dausset-CEPH (Centre d'Etude du Polymorphisme Humain), CEPH-Biobank, Paris, France                       | Paris                                    |                                                         |                                                                                            |
| Ouissam                           | Ouili           |                       |                  | Fondation Jean Dausset-CEPH (Centre d'Etude du Polymorphisme Humain), CEPH-Biobank, Paris, France                       | Paris                                    |                                                         |                                                                                            |
| Laetitia                          | Ninove          |                       |                  | Fondation Jean Dausset-CEPH (Centre d'Etude du Polymorphisme Humain), CEPH-Biobank, Paris, France                       | Paris                                    |                                                         |                                                                                            |
| Stéphane                          | Priet           |                       | PhD              | Unité des Virus Émergents, UVE, IRD 190, INSERM 1207, Aix Marseille Univ, IHU Méditerranée Infection, Marseille, France | Marseille                                |                                                         |                                                                                            |
| Paola Mariela                     | Saba Villarroel |                       | PhD              | Unité des Virus Émergents, UVE, IRD 190, INSERM 1207, Aix Marseille Univ, IHU Méditerranée Infection, Marseille, France | Marseille                                |                                                         |                                                                                            |
| Toscane                           | Fourié          |                       | PhD              | Unité des Virus Émergents, UVE, IRD 190, INSERM 1207, Aix Marseille Univ, IHU Méditerranée Infection, Marseille, France | Marseille                                |                                                         |                                                                                            |
| Souand Mohamed                    | Ali             |                       | PhD              | Unité des Virus Émergents, UVE, IRD 190, INSERM 1207, Aix Marseille Univ, IHU Méditerranée Infection, Marseille, France | Marseille                                |                                                         |                                                                                            |

Supplemental Online Content: Nonauthor Collaborators

\*First name, last name, and suffix (if applicable) are required and will appear in PubMed.

| *First Name and Middle Initial(s) | *Last Name | *Suffix (eg, Jr, III) | Academic Degrees | Institution                                                                                                             | Location (city, state/province, country) | Role or Contribution, eg, chair, principal investigator | Group (if more than 1 Group listed in the byline) and/or Subgroup (eg, Steering Committee) |
|-----------------------------------|------------|-----------------------|------------------|-------------------------------------------------------------------------------------------------------------------------|------------------------------------------|---------------------------------------------------------|--------------------------------------------------------------------------------------------|
| Abdenour                          | Amroun     |                       | PhD              | Unité des Virus Émergents, UVE, IRD 190, INSERM 1207, Aix Marseille Univ, IHU Méditerranée Infection, Marseille, France | Marseille                                |                                                         |                                                                                            |
| Morgan                            | Seston     |                       | PhD              | Unité des Virus Émergents, UVE, IRD 190, INSERM 1207, Aix Marseille Univ, IHU Méditerranée Infection, Marseille, France | Marseille                                |                                                         |                                                                                            |
| Nazli                             | Ayhan      |                       | PhD              | Unité des Virus Émergents, UVE, IRD 190, INSERM 1207, Aix Marseille Univ, IHU Méditerranée Infection, Marseille, France | Marseille                                |                                                         |                                                                                            |
| Boris                             | Pastorino  |                       | PhD              | Unité des Virus Émergents, UVE, IRD 190, INSERM 1207, Aix Marseille Univ, IHU Méditerranée Infection, Marseille, France | Marseille                                |                                                         |                                                                                            |
